# Supplementary material
Source: Frontiers journal article supplement (https://www.frontiersin.org/articles/190742)
Supplement: Data_Sheet_1.XLS [file Data_Sheet_1.XLS]

## Sheet: Synthesis Task Completion time
	TIME TO COMPLETE THE FULL TASK (CHOOSE INGREDIENTS + GUESS RECIPE) --> data are in milliseconds
	Child 1	Child 2	Child 3	Child 4	Child 5	Child 6	Child 7	Child 8	Child 9	Child 10	Average			Sessions	Task completion time
T1	81073.5	97377.5	139479	83889.8	59550.5	166967	69937.5	86371	52302	60797	89774.5			T1	83698.7
T2	89725.3	120720	91523	56982.4	55090.7	42065.2	44732.5	83237	92703.7	36486.3	71326.6			T2	60328
T3	74418	63565	73481.2	51543.8	47651.4	74050.2	61230.7	83231.2	70852.8	37913.8	63793.8			T3	61283.5
T4	41004.3	59637.7	89089	80604.5	56945	69438.1	86832.7	74960	64446.5	52240.4	67519.8			T4	69123.4
T5	60779.8	49732	67235	78688	48697	87373.5	56795.2	40172.7	60112.8	34159	58374.5			T5	58046.6
T6	67721.3	66659	73637.5	55715	39711.8	51200.3	47025	87725	55057.3	37968.5	58242.1			T6	54080.6
T7	46175.5	53941	74959	53984	49237.3	87373.5	46767	82540	58316.2	34581.3	58787.5			T7	58948.4
T8	61389.7	86804	59587	56917.5	63936	58882	38670.5	70930	62691.3	36785	59659.3			T8	56059
T9	78353	64907.8	62305	55351.2	45822.6	79706	63099.5	70302	68466.8	53939	64225.3			T9	62614
T10	59391	50067.3	80508.5	56965	41116.7	74529.9	52229	101116	68174.7	43727.7	62782.6			T10	62580.2
T11		90059	48349.5	54011.8	40389.3	72368	61448.8	45668.7	73381.3	43885	58840.2			T11	56249.1
T12		79195.3	53371	51486.6		74566.8	51671.9	57434.3	73033.5	46689	60931			T12	59401.9
T13		56554.3	44829	58020.1					60604.5	30093	50020.2			T13	49684.5
T14			53946.5	43549.9					73924.5	26017	49359.5			T14	48212.7
T15			57617						70668.5		64142.8			T15	67405.6
T16			45452						37239		41345.5			T16	39292.2

## Sheet: Synthesis Nb of error
	TOTAL NUMBER OF ERRORS		(FREE DRAWING)
	Child 1	Child 2	Child 3	Child 4	Child 5	Child 6	Child 7	Child 8	Child 9	Child 10		Nb of errors
T1	10	0	0	4	7	5	4	0	0	0	T1	3
T2	7	0	0	0	3	13	19	2	3	12	T2	5.9
T3	10	0	0	0	9	6	7	7	6	0	T3	4.5
T4	2	1	0	0	5	5	8	1	12	5	T4	3.9
T5	1	0	1	10	5	2	3	2	9	0	T5	3.3
T6	1	0	0	0	3	0	0	0	7	1	T6	1.2
T7	1	0	0	5	4	2	7	0	4	0	T7	2.3
T8	4	0	1	2	5	2	0	0	2	1	T8	1.7
T9	2	2	1	2	9	2	1	3	2	3	T9	2.7
T10	4	2	3	3	0	10	8	2	6	3	T10	4.1
T11		1	3	2	1	0	1	5	2	9	T11	2.66667
T12		0	0	0		5	2	3	5	4	T12	2.375
T13		1	1	3					1	5	T13	2.2
T14			0	0					0	2	T14	0.5
T15			2						2		T15	2
T16			0						0		T16	0
	T1-T4	T5-T8	T9-T12	T13-T16
Child 1	10	1	2
Child 2	0	0	2	1
Child 3	0	1	1	1
Child 4	4	10	2	3
Child 5	7	5	9
Child 6	5	2	2
Child 7	4	3	1
Child 8	0	2	3
Child 9	0	9	2	1
Child 10	0	0	3	5
Child 1	7	1	4
Child 2	0	0	2
Child 3	0	0	3	0
Child 4	0	0	3	0
Child 5	3	3	0
Child 6	13	0	10
Child 7	19	0	8
Child 8	2	0	2
Child 9	3	7	6	0
Child 10	12	1	3	2
Child 1	10	1
Child 2	0	0	1
Child 3	0	0	3	2
Child 4	0	5	2
Child 5	9	4	1
Child 6	6	2	0
Child 7	7	7	1
Child 8	7	0	5
Child 9	6	4	2	2
Child 10	0	0	9
Child 1	2	4
Child 2	1	0	0
Child 3	0	1	0	0
Child 4	0	2	0
Child 5	5	5
Child 6	5	2	5
Child 7	8	0	2
Child 8	1	0	3
Child 9	12	2	5	0
Child 10	5	1	4
	T1	T2	T3	T4
Minimum	0	0	0	0
25th percentile	0	0	1	0
Median	3.5	1	2	1
75th percentile	7	3.25	4	2
Maximum	19	10	10	5
	Period 1	Period 2	Period 3	Period 4
Series1	0	0	0	0
Series2	0	0	1	0
Series3	3.5	1	1	1
Series4	3.5	2.25	2	1
Series5	12	6.75	6	3
